# Supplementary material
Source: MDPI journal article supplement (https://www.mdpi.com/2673-7167/2/4/27)
Supplement: s1 [file s1 › physchem-1867008-supplementary.pdf]

# The True Nature of the Energy Calibration for Nuclear Resonant Vibrational Spectroscopy: A Time-Based Conversion

Hongxin Wang <sup>1,\*†</sup>, Yoshitaka Yoda <sup>2,†</sup> and Jessie Wang <sup>3,†</sup>

<sup>1</sup> SETI Institute, Mountain View, CA 94043, USA

<sup>2</sup> Research and Utilization Division, SPring-8/JASRI, 1-1-1 Kouto, Sayo, Hyogo 679-5198, Japan

<sup>3</sup> School of Computer Science, Georgia Institute of Technology, Atlanta, GA 30332, USA

\* Correspondence: hongxin.ucd@gmail.com

† These authors contributed equally to this work.

Supporting Information (SI):

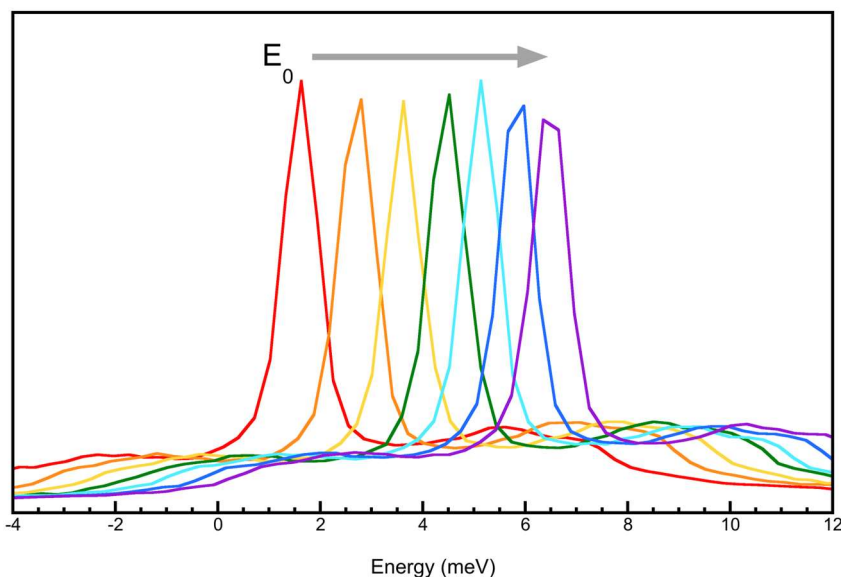

**Figure S1.** A series of NRVS spectra for  $^{57}\text{Fe}$  powder: the  $E_0$  position drifts to the higher-energy direction as scanning time increases (red  $\rightarrow$  orange  $\rightarrow$  yellow  $\rightarrow$  green  $\rightarrow$  cyan  $\rightarrow$  dark blue  $\rightarrow$  purple).
